# Supplementary material
Source: PubMed Central journal article supplement (PMC4657577)

SUPPLEMENTARY DATA

**Supplementary Table 1. RT-PCR and ChIP oligonucleotides**

| <b>Name</b>                                   | <b>Left primer</b>          | <b>Right primer</b>         |
|-----------------------------------------------|-----------------------------|-----------------------------|
| <b>Rat</b>                                    |                             |                             |
| β-actin                                       | AACACCCCAGCCATGTACGTAG      | GAACCGCTCATTGCCGATAGT       |
| c-Myc                                         | CGAGCTGAAGCGTAGCTTTT        | CTCGCCGTTTCCTCAGTAAG        |
| ChREBP <sub>common</sub>                      | TACTGTTCCCTGCCTGCTC         | CTTGGAACCTTCACCAGG          |
| ChREBP <sub>α</sub>                           | TGCATCGATCACAGGTCATT        | AGGCTCAAGCATTGAAGAG         |
| ChREBP <sub>β</sub>                           | TCTGCAGATCGCGCGGAG          | CTTGTCCCGGCATAGCAA C        |
| Pklr                                          | GTGGAGCACGGTGGTATCTT        | CTTCACGCCTTCATGGTTCT        |
| Txnip                                         | CTGATGGAGGCACAGTGAGA        | CTCGGGTGGAGTGCTTAGAG        |
| Hbegf                                         | GACCGATCTGGACCTTTTCA        | CCGTGGATGCAGTAGTCCTT        |
| GPDH                                          | ATCAACACGCAACACGAGAA        | CCCTTGAGCTGGTCACAGAT        |
| Acaca                                         | CGCTCACCAACAGTAAGGTGG       | GCTTGGCAGGGAGTTCTC          |
| -17130 ChIP                                   | GGGGTACACGGAGAAACCAT        | GCCCCTTGTTCCCTAAACTC        |
| -17530 ChIP                                   | CATGGAAGCTGCAGACAAGA        | CGGGGGCTTGATGTCTACT         |
| -17300 ChREBP <sub>β</sub><br>Ebox/ChORE ChIP | GCCGCAGAAGGTGATTGG          | GCTTTTAGACTGGGGTGTGG        |
| -17200 TSS ChIP                               | CTAGCAGTCCACACCCCAGT        | GACTGGATCCTGGGACCTC         |
| -17100 ChREBP <sub>β</sub><br>ChOREChIP       | GAGGTCCAGGATCCAGTC          | ATTTAGGGATGCCCTCTTC         |
| -16820 ChIP                                   | AAGAGGGGCATCCCTAAATC        | CCCTTCACCAGATCACCCT         |
| -15350 ChIP                                   | AACGGGCTCAGAGAAGTCAA        | GGGTGCCTACTTGCCTACAA        |
| -12990 ChIP                                   | GCTCTGTAGCTCTGGCTGCT        | TTTGCTTGTCTCTGCCTCCT        |
| -8710 ChIP                                    | AGGAAGTGCTGCTCAGTGGT        | ACACACCAGAAGAGGGGCATC       |
| -5550 ChIP                                    | GCACACGTAGCAGTCAGAGG        | CTGAACGTACCGAGGACCAT        |
| -250 ChIP                                     | CCCGAGTGTTGCACTTAACA        | GCATAACCAATGAGCCTGGT        |
| <b>Mouse</b>                                  |                             |                             |
| ChREBP <sub>common</sub>                      | CACTCAGGGAATACACGCCTAC      | ATCTTGGTCTTAGGGTCTTCAGG     |
| ChREBP <sub>α</sub>                           | CGACACTCACCCACCTCTTC        | TTGTTCAGCCGGATCTTGTC        |
| ChREBP <sub>β</sub>                           | TCTGCAGATCGCGTGGAG          | CTTGTCCCGGCATAGCAA          |
| -17060 Ebox/ChoRE<br>ChIP                     | GCGGCAGAAGGTGATTGG          | TAGACTGGGGTGTGGACTGC        |
| -16854 ChoRE ChIP                             | GACCCGAGGTCCCAGGAT          | CCTCTGCGAGGCATCTATGT        |
| α-actin ChIP                                  | AGAGCAATAAGCCCCTCCA         | AGGGCAGGGTAGAGGATCAG        |
| + 25,657 Coding<br>Region ChIP                | CGTCCCCTTCTCTGTAGACC        | GTTGTTGTCTCTGGCAGTGG        |
| <b>Human</b>                                  |                             |                             |
| ChREBP <sub>common</sub>                      | <b>CTGTCCTGAACTCCCTACGC</b> | <b>AGGGAGTGCCCAGAGATGAT</b> |
| ChREBP <sub>α</sub>                           | <b>ACTCGGACTCGGACACAGAC</b> | <b>AGGCTCAAGCACTCGAAGAG</b> |
| ChREBP <sub>β</sub>                           | CTGCAGGTCGAGCGGATT          | GTCTGTGTCCGAGTCCGAGT        |
| ACACA                                         | CATGCGGTCTATCCGTAGGT        | TGTTGTTGTTTGGTCTCCA         |
| FAS                                           | AGGCTGCTGTGGAAGGATAA        | GCCTTGTCCTGCAGTGTGTA        |
| PKLR                                          | CTGGTGATTGTGGTGACAGG        | TGGGCTGGAGAACGTAGACT        |

All sequences listed are from 5' to 3'

SUPPLEMENTARY DATA

**Supplementary Table 2. EMSA oligonucleotides**

|                                | sense                               | antisense                           |
|--------------------------------|-------------------------------------|-------------------------------------|
| Ebox-<br>ChoRE<br>EMSA         | GCGTTCTCGGCTGCCATCCACGTGTCGA<br>ACG | CGTTGACACGTGGATGGCAGCCGAGA<br>ACGC  |
| Mut Ebox-<br>ChoRE<br>EMSA     | GCGTTCTCGGCTGCCATCTGGACTTCGA<br>ACG | CGTTGGAAGTCCAGATGGCAGCCGAGA<br>ACGC |
| Acaca-<br>ChoRE<br>EMSA        | GGTGTCCATGTGAAAACGTCGTGGGCAG        | CTGCCACGACGTTTTTACATGGACACC         |
| Mut<br>Acaca-<br>ChoRE<br>EMSA | GGTGTCCATGTGAAAACGTATGGATCAG        | CTGATCCATACGTTTTTACATGGACACC        |

All sequences listed are from 5' to 3'

**Supplementary Figure 1.**

**Depletion of ChREBP $\alpha$  abrogates expression of ChREBP $\beta$ .** An assumption of the relationship between ChREBP $\alpha$  and ChREBP $\beta$  is that ChREBP $\alpha$  must be expressed and activated by glucose to activate the ChoRE of ChREBP $\beta$  in order to drive expression of ChREBP $\beta$ . A prediction of this assumption is that depletion of ChREBP $\alpha$  would block expression of ChREBP $\beta$ . INS-1-derived 832/13 cells were treated with siRNA directed against ChREBP $\alpha$  exon 1a for 48 h and then treated with either 2 or 20 mM glucose. Total RNA was collected and subjected to RT-PCR using primers specific for the indicated exons. Depletion of ChREBP $\alpha$  was confirmed in 2 mM glucose since 20 mM glucose decreases its expression in these cells (Figure 1). The siRNA against ChREBP $\alpha$  significantly decreased its target and ChREBP as well as a Pklr, a ChoRE-containing target gene of ChREBP.

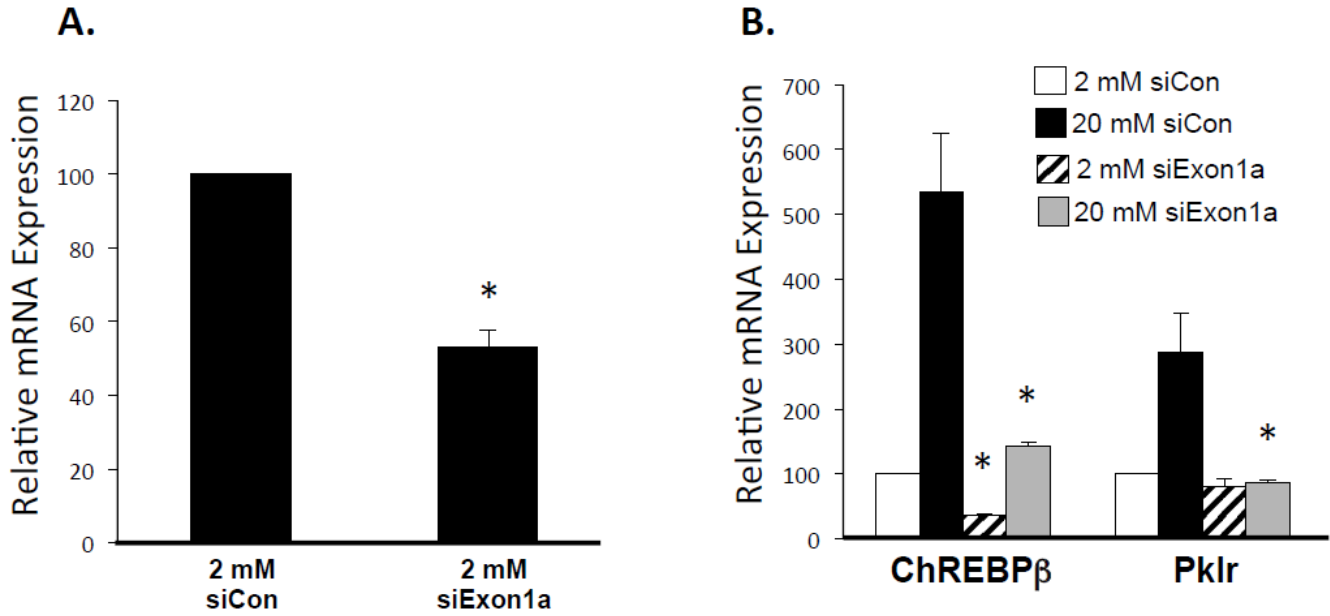

Supplement: supp_db15-0239_DB150239SupplementaryData.pdf [file supp_db15-0239_DB150239SupplementaryData.pdf]
